# Supplementary material for: Non-adiabatic dynamics simulations of the S1excited-state relaxation of diacetyl phenylenediamine
Source: Royal Society of Chemistry journal article supplement (doi:10.1039/d3cp01826a), 2023-01-01
Supplement: d3cp01826a1.pdf [file d3cp01826a1.pdf]

# Supporting Information: Non-adiabatic dynamics simulations of the $S_1$ excited-state relaxation of diacetyl phenylenediamine

Xiaohang Chen, Wei Wang, Dongyi Xiao, Shu-Hua Xia\* and Yan Zhang\*

College of Life and Environmental Science, Minzu University of China, Beijing 100081, China.

## Table of Contents

1. Active space of calculations
2. Selected dihedral angles of structures from CAS(10,8)/6-31G\* and OM2/MRCI optimizations and relative energies from OM2/MRCI and single point MS-CASPT2 calculations.
3. Optimized structures of *m*-DAPA obtained from OM2/MRCI method.
4. Optimized structures of partial *m*-DAPA structures calculated by CASSCF.
5. The deactivation pathways of *m*-DAPA.
6. Optimized conical intersection structure of  $\alpha$ -DAPA calculated by CASSCF.
7. Minimum-energy reaction paths with proton transfer reaction coordinates of  $\alpha$ -DAPA computed at MS-CASPT2//CAS(12,10)/def2-TZVP level.
8. Non-adiabatic dynamics simulation results of  $\alpha$ -DAPA.
9. Cartesian coordinates of all optimized structures calculated by CASSCF.
10. Cartesian coordinates of all optimized structures calculated by OM2/MRCI.
11. Cartesian coordinates of all optimized structures calculated by B3LYP/6-31G\* and CAM-B3LYP methods.
12. Cartesian coordinates of optimized CI structure of  $\alpha$ -DAPA calculated by CASSCF method.

## 1. Active space of calculations

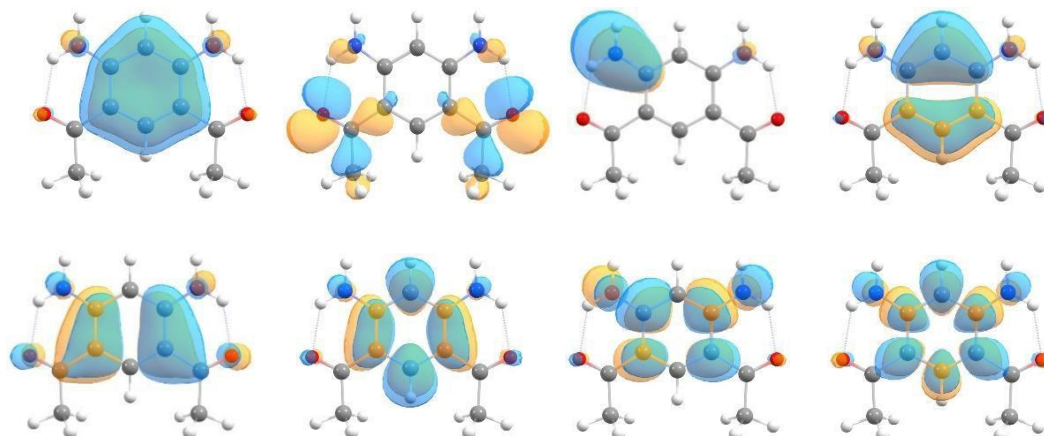

**Figure S1.** The active space (10e,8o) of *m*-DAPA used in the CAS(10,8)/6-31G\* calculations.

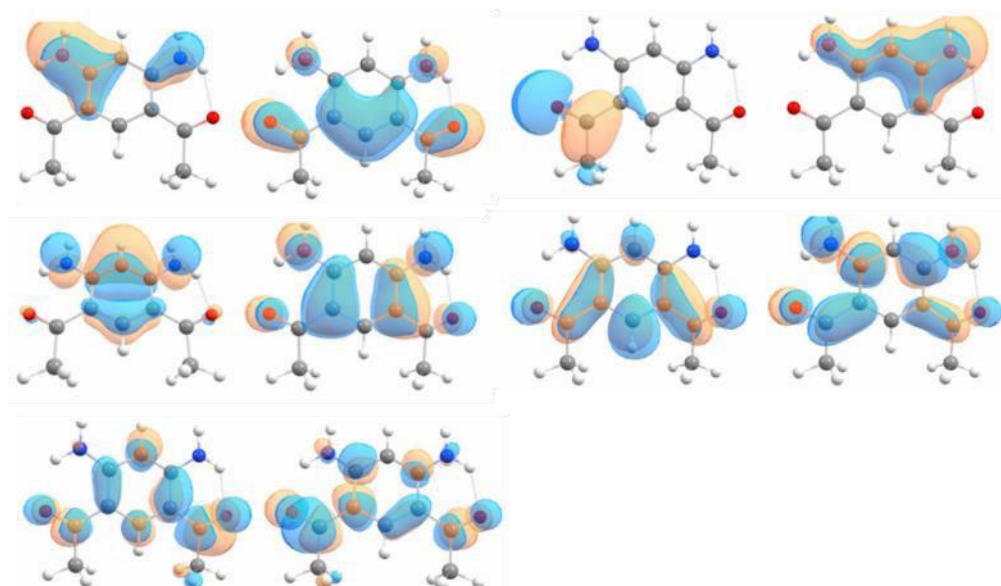

**Figure S2.** The active space (12e,10o) of *m*-DAPA used in the MS-CASPT2//CAS(12,10)/def2-TZVP calculations.

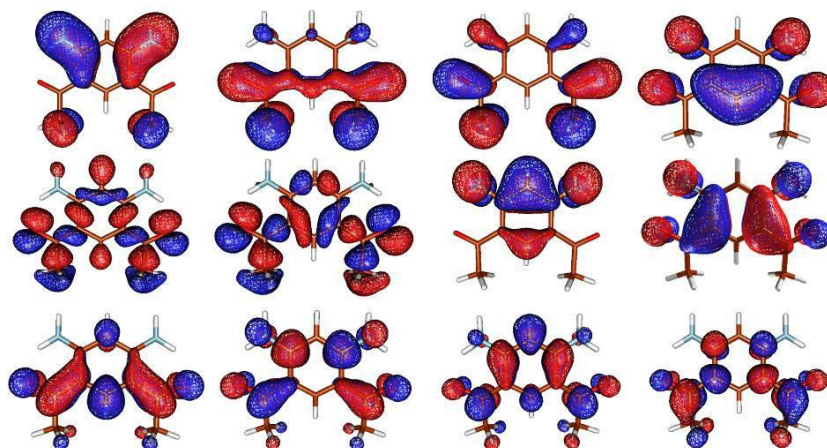

**Figure S3.** The active space (16e,12o) of *m*-DAPA used in the OM2/MRCI calculations.

2. Selected dihedral angles of structures from CAS(10,8)/6-31G\* and OM2/MRCI optimizations and relative energies from OM2/MRCI and single point MS-CASPT2 calculations.

**Table S1.** Two Selected Dihedral Angles of Structures from CAS(10,8)/6-31G\* and OM2/MRCI Optimizations and Relative Energies from OM2/MRCI and Single Point MS-CASPT2 Calculations.

| <b>Structures</b>       | <b>C4C3C11O12<br/>(Degree)</b> | <b>C6C1C10O9<br/>(Degree)</b> | <b><math>\Delta E</math> (kcal/mol)</b> |
|-------------------------|--------------------------------|-------------------------------|-----------------------------------------|
| <b>CAS(10,8)/6-31G*</b> |                                |                               |                                         |
| S0-KETO                 | 0.018                          | -0.024                        | 0.0                                     |
| S0-1PT                  | -2.689                         | 26.868                        | 42.1                                    |
| S1-KETO                 | 4.112                          | -4.112                        | 84.0                                    |
| S1-1PT                  | 0.030                          | 0.038                         | 70.3                                    |
| S1S0-1PT                | 2.360                          | 96.038                        | 71.3                                    |
| <b>OM2/MRCI</b>         |                                |                               |                                         |
| S0-KETO                 | 4.861                          | 8.315                         | 0.0                                     |
| S0-1PT                  | -2.697                         | 32.473                        | 44.6                                    |
| S1-KETO                 | 0.018                          | 0.016                         | 87.2                                    |
| S1-1PT                  | 4.053                          | -24.405                       | 74.1                                    |
| S1S0-1PT                | -0.153                         | 88.009                        | 82.8                                    |

3. Optimized structures of *m*-DAPA obtained from OM2/MRCI method.

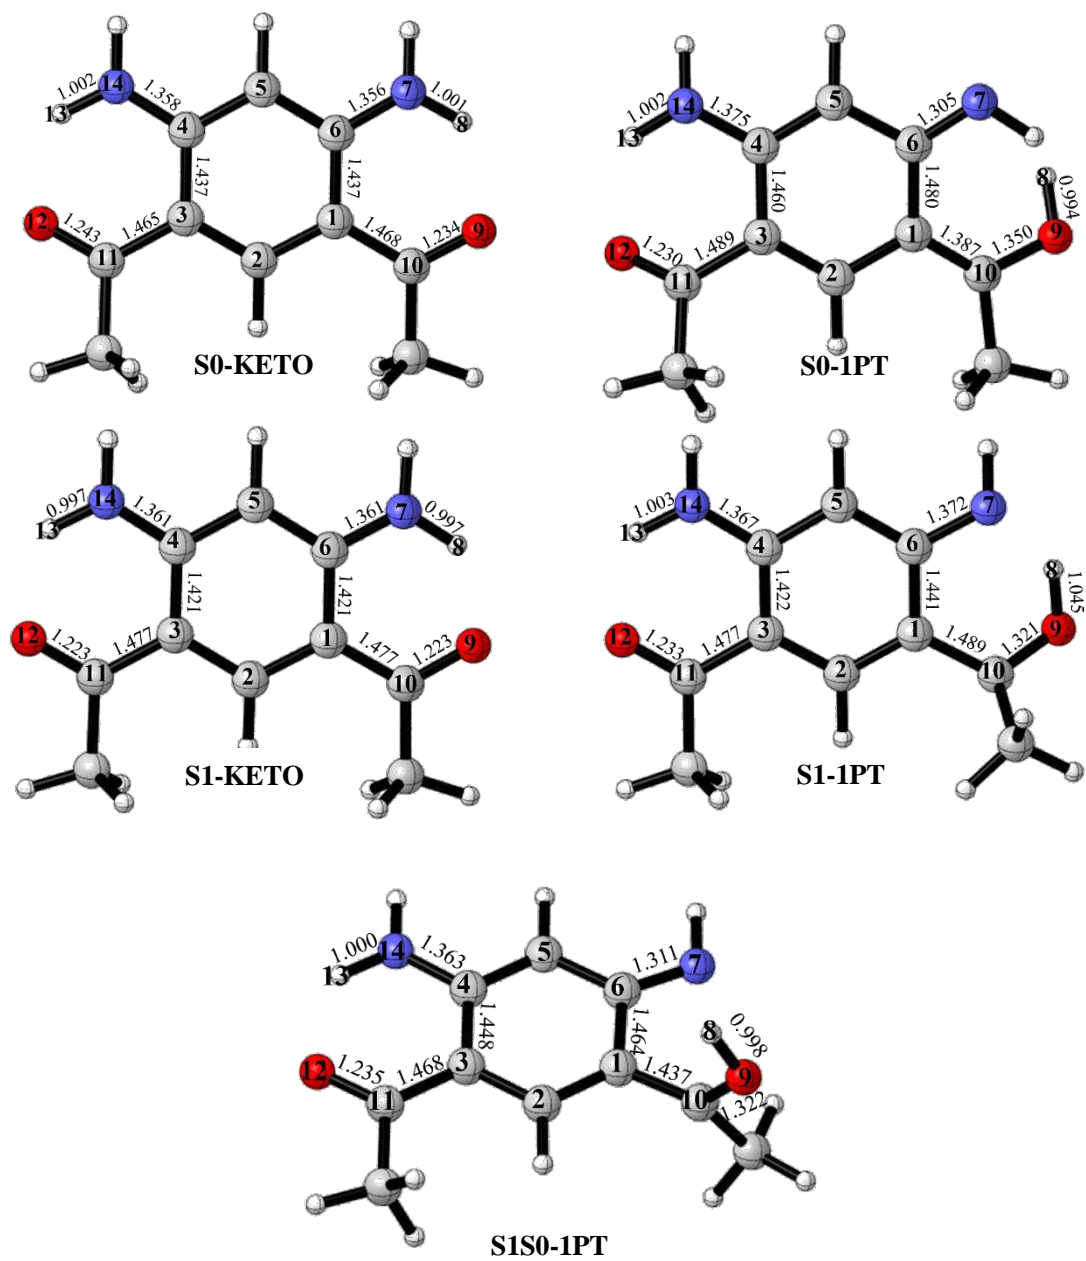

**Figure S4.** Structures of  $S_0$ ,  $S_1$  and CI calculated by OM2/MRCI method.

4. Optimized structures of *m*-DAPA calculated by CASSCF.

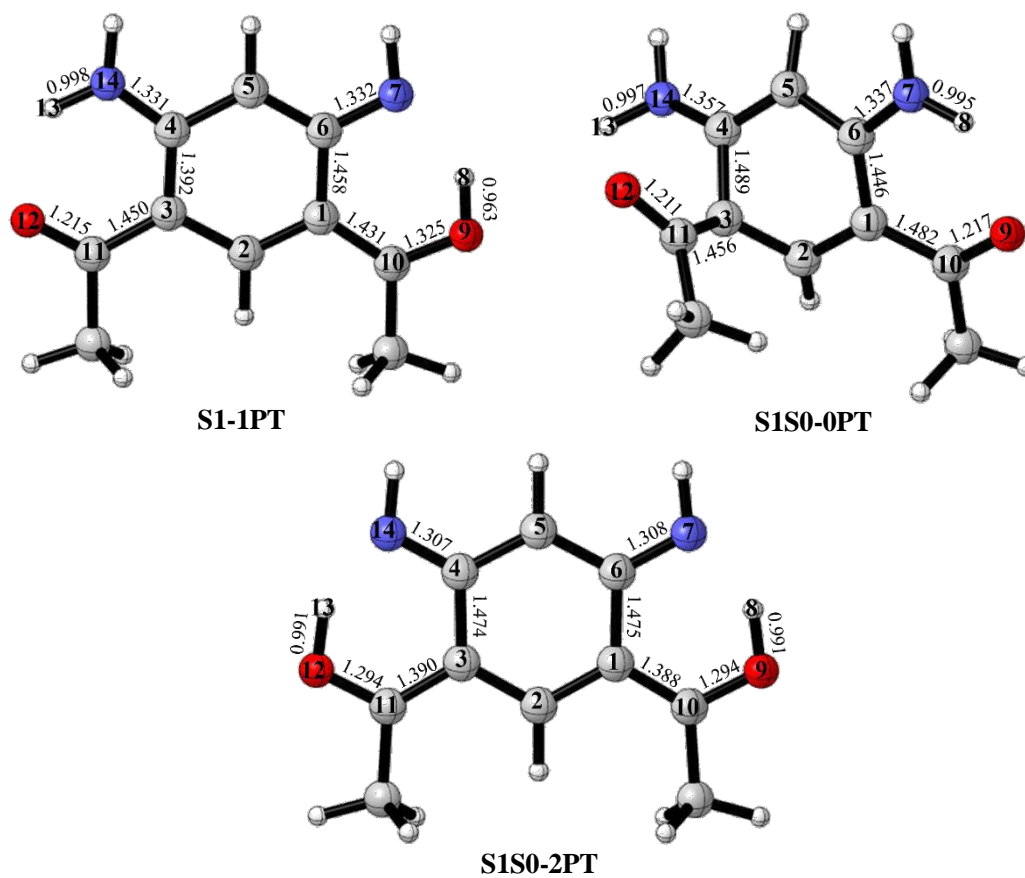

**Figure S5.** Structures of S1-1PT, S1S0-0PT and S1S0-2PT calculated at CAS(10,8)/6-31G\* level.

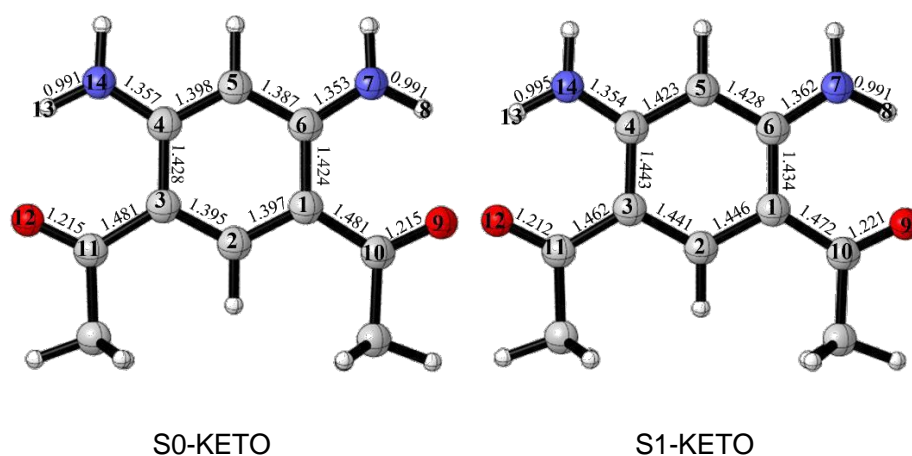

**Figure S6.** Structures of S0-KETO and S1-KETO calculated at CAS(12,10)/6-31G\* level.

5. The deactivation pathways of *m*-DAPA.

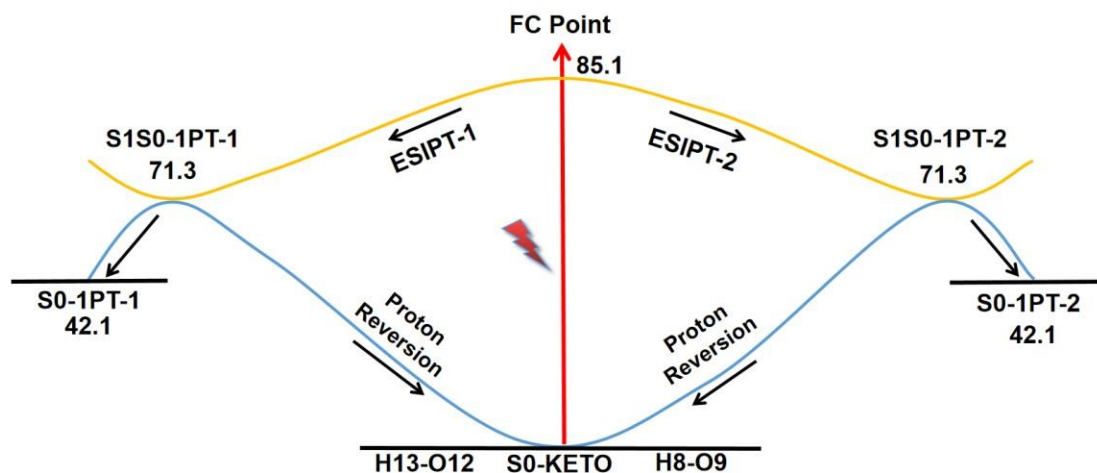

**Figure S7.** The deactivation pathways of *m*-DAPA.

6. Optimized conical intersection structure of  $\sigma$ -DAPA calculated by CASSCF.

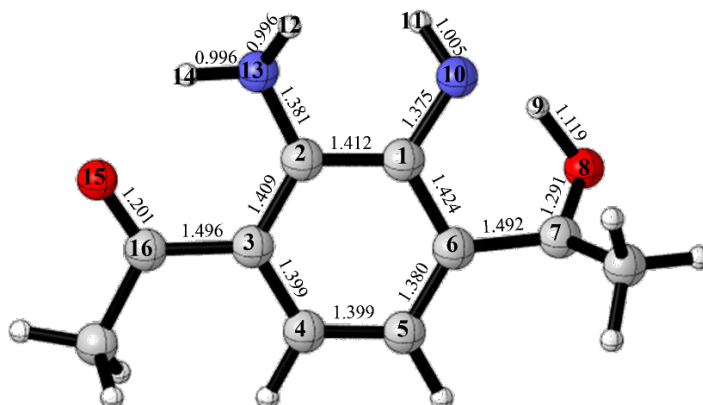

**Figure S8.** Structure of CI point of  $\sigma$ -DAPA calculated by CASSCF method.

7. Minimum-energy reaction paths with proton transfer reaction coordinates of *o*-DAPA computed at MS-CASPT2//CAS(12,10)/def2-TZVP level.

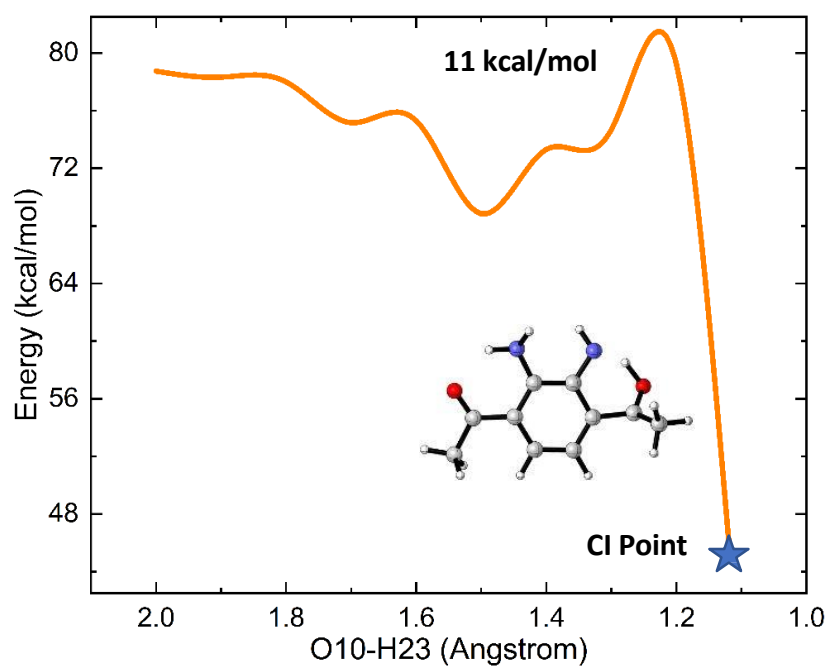

**Figure S9.** Minimum-energy reaction paths with proton transfer reaction coordinates computed of *o*-DAPA at MS-CASPT2//CAS(12,10)/def2-TZVP level.

8. Non-adiabatic dynamics simulation results of  $\alpha$ -DAPA.

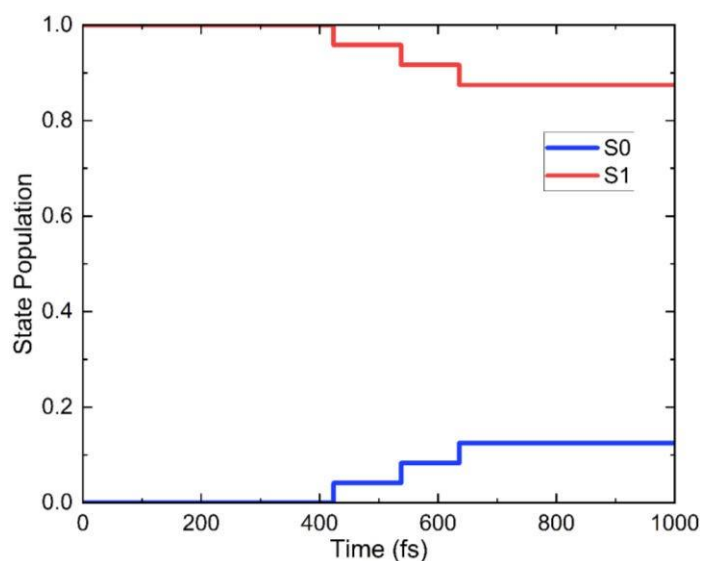

**Figure S10.** Time dependent S<sub>1</sub> and S<sub>0</sub> state population of  $\alpha$ -DAPA.

The same dynamics calculation method as for  $m$ -DAPA was used to perform the dynamics simulations for  $\alpha$ -DAPA. In the surface-hopping dynamics of  $\alpha$ -DAPA, a total of 24 trajectories were simulated, of which only 3 successfully returned to the ground state via the surface hopping structures at the end of 1 ps simulation time. All 3 trajectories went through the single proton transfer process.



9. Cartesian coordinates of all optimized structures calculated by CASSCF.

**Table S2.** Cartesian coordinates of the Optimized Geometry of *m*-DAPA at S0-KETO calculated by CASSCF.

| Atom | x            | y            | z            |
|------|--------------|--------------|--------------|
| C    | 1.227574000  | 0.107304000  | 0.000519000  |
| C    | 0.000001000  | 0.761475000  | 0.000042000  |
| C    | -1.227575000 | 0.107309000  | 0.000403000  |
| C    | -1.228566000 | -1.313378000 | 0.001243000  |
| C    | -0.000004000 | -1.974224000 | 0.001691000  |
| C    | 1.228559000  | -1.313383000 | 0.001358000  |
| H    | 0.000003000  | 1.828677000  | -0.000495000 |
| H    | -0.000007000 | -3.046874000 | 0.002145000  |
| N    | -2.382961000 | -2.033395000 | 0.001490000  |
| H    | -3.254362000 | -1.548787000 | 0.001301000  |
| H    | -2.356125000 | -3.027726000 | 0.002779000  |
| N    | 2.382953000  | -2.033403000 | 0.001724000  |
| H    | 2.356114000  | -3.027734000 | 0.002977000  |
| H    | 3.254354000  | -1.548797000 | 0.001607000  |
| C    | -2.492538000 | 0.870753000  | 0.000040000  |
| C    | 2.492540000  | 0.870742000  | 0.000260000  |
| O    | -3.591011000 | 0.332025000  | 0.000851000  |
| O    | 3.591010000  | 0.332009000  | 0.000931000  |
| C    | -2.416934000 | 2.388795000  | -0.001191000 |
| H    | -1.900680000 | 2.752654000  | 0.879493000  |
| H    | -1.900566000 | 2.751311000  | -0.882346000 |
| H    | -3.427811000 | 2.768014000  | -0.001521000 |
| C    | 2.416943000  | 2.388784000  | -0.001121000 |
| H    | 1.900589000  | 2.751217000  | -0.882319000 |
| H    | 1.900678000  | 2.752730000  | 0.879520000  |
| H    | 3.427822000  | 2.767998000  | -0.001476000 |

**Table S3.** Cartesian coordinates of the Optimized Geometry of *m*-DAPA at S0-1PT calculated by CASSCF.

| Atom | x            | y            | z            |
|------|--------------|--------------|--------------|
| C    | -1.225982000 | 0.126969000  | 0.079674000  |
| C    | -0.066762000 | 0.814928000  | 0.226338000  |
| C    | 1.247763000  | 0.179661000  | 0.119502000  |
| C    | 1.258727000  | -1.305391000 | 0.251537000  |
| C    | 0.011666000  | -1.980617000 | -0.103556000 |
| C    | -1.179173000 | -1.337980000 | -0.152616000 |
| H    | -0.105304000 | 1.876265000  | 0.360578000  |
| H    | 0.057011000  | -3.052839000 | -0.167999000 |
| N    | 2.239784000  | -2.025032000 | 0.673371000  |
| H    | 3.427432000  | -0.615701000 | -0.702170000 |
| H    | 2.998475000  | -1.461026000 | 1.014242000  |
| N    | -2.380645000 | -2.031775000 | -0.270337000 |
| H    | -2.269666000 | -2.969057000 | -0.591770000 |
| H    | -3.098780000 | -1.543920000 | -0.758389000 |
| C    | 2.339939000  | 0.881644000  | -0.235064000 |
| C    | -2.519065000 | 0.883093000  | 0.041097000  |
| O    | 3.517261000  | 0.318596000  | -0.551794000 |
| O    | -3.448428000 | 0.498725000  | -0.608662000 |
| C    | 2.457237000  | 2.369219000  | -0.386325000 |
| H    | 1.621739000  | 2.913428000  | 0.023433000  |
| H    | 3.363169000  | 2.694038000  | 0.112334000  |
| H    | 2.559187000  | 2.617391000  | -1.437931000 |
| C    | -2.633446000 | 2.180343000  | 0.818233000  |
| H    | -3.679461000 | 2.444916000  | 0.880337000  |
| H    | -2.213126000 | 2.091905000  | 1.812722000  |
| H    | -2.111180000 | 2.979294000  | 0.300766000  |

**Table S4.** Cartesian coordinates of the Optimized Geometry of *m*-DAPA at S1-KETO calculated by CASSCF.

| Atom | x            | y            | z            |
|------|--------------|--------------|--------------|
| C    | 1.269285320  | 0.114540870  | -0.016571430 |
| C    | 0.000018180  | 0.801221030  | -0.023238730 |
| C    | -1.269302090 | 0.114642740  | -0.016521130 |
| C    | -1.251601460 | -1.323131350 | -0.040691810 |
| C    | -0.000091090 | -2.009118290 | -0.063845610 |
| C    | 1.251474370  | -1.323228970 | -0.040672700 |
| H    | 0.000062310  | 1.867536640  | 0.009849170  |
| H    | -0.000132560 | -3.079175290 | -0.164365730 |
| N    | -2.396140240 | -2.065876640 | -0.139405440 |
| H    | -3.254025710 | -1.604937240 | 0.065584630  |
| H    | -2.338475270 | -3.021697300 | 0.130187130  |
| N    | 2.395959180  | -2.066061780 | -0.139398290 |
| H    | 2.338203230  | -3.021886850 | 0.130160210  |
| H    | 3.253864100  | -1.605204700 | 0.065698030  |
| C    | -2.524222310 | 0.882260830  | 0.052565560  |
| C    | 2.524259080  | 0.882065680  | 0.052579880  |
| O    | -3.600957430 | 0.349770440  | 0.165659520  |
| O    | 3.600945830  | 0.349504410  | 0.165790870  |
| C    | -2.468093880 | 2.397660570  | -0.012939560 |
| H    | -1.945111000 | 2.806535030  | 0.845773400  |
| H    | -1.959229130 | 2.738803680  | -0.908112990 |
| H    | -3.482587710 | 2.768882260  | -0.014938700 |
| C    | 2.468286000  | 2.397441140  | -0.013601290 |
| H    | 1.959261950  | 2.738304890  | -0.908786990 |
| H    | 1.945531920  | 2.806690130  | 0.845076720  |
| H    | 3.482817390  | 2.768559080  | -0.015925720 |

**Table S5.** Cartesian coordinates of the Optimized Geometry of *m*-DAPA at S1-1PT calculated by CASSCF.

| Atom | x           | y           | z           |
|------|-------------|-------------|-------------|
| C    | 1.28600402  | 0.01663237  | -0.01621572 |
| C    | 0.07807750  | 0.69827308  | -0.00372978 |
| C    | -1.24620106 | 0.08314134  | -0.02154748 |
| C    | -1.26045828 | -1.30816726 | -0.05405212 |
| C    | -0.00730012 | -2.05265725 | -0.06821153 |
| C    | 1.25020435  | -1.44048662 | -0.05052309 |
| H    | 0.11201541  | 1.76762585  | 0.02121903  |
| H    | -0.06524380 | -3.12664052 | -0.09341122 |
| N    | -2.37530350 | -2.03453775 | -0.07385820 |
| H    | -3.25530554 | -1.56347504 | -0.06491220 |
| H    | -2.33738884 | -3.02633262 | -0.09649998 |
| N    | 2.40079808  | -2.11191166 | -0.06338714 |
| H    | 2.24947631  | -3.10466718 | -0.08731431 |
| H    | 3.62952785  | -0.77659790 | -0.02944900 |
| C    | -2.47130290 | 0.85831240  | -0.00724870 |
| C    | 2.51820796  | 0.74339653  | 0.00412561  |
| O    | -3.57438392 | 0.34805738  | -0.02203652 |
| O    | 3.71844446  | 0.18249074  | -0.00657211 |
| C    | -2.38198696 | 2.37362006  | 0.02764271  |
| H    | -1.85791370 | 2.71656778  | 0.91443145  |
| H    | -1.85292565 | 2.75667162  | -0.83955105 |
| H    | -3.38637978 | 2.77176149  | 0.03390446  |
| C    | 2.58639697  | 2.24189746  | 0.03973177  |
| H    | 3.62493859  | 2.54119472  | 0.05150029  |
| H    | 2.11090518  | 2.68803672  | -0.82920357 |
| H    | 2.10284216  | 2.64684632  | 0.92420121  |

**Table S6.** Cartesian coordinates of the Optimized Geometry of *m*-DAPA at S1S0-0PT calculated by CASSCF.

| Atom | x           | y           | z           |
|------|-------------|-------------|-------------|
| C    | -1.08021140 | 0.25151518  | -0.22908096 |
| C    | -0.00115259 | 0.71776876  | -0.99437784 |
| C    | 1.26146113  | 0.13063151  | -0.52129154 |
| C    | 1.29759061  | -1.35189581 | -0.65883367 |
| C    | 0.21493470  | -1.91845638 | -0.08625031 |
| C    | -0.87195397 | -1.05394304 | 0.35619524  |
| H    | -0.10740675 | 1.26499980  | -1.91415826 |
| H    | 0.07275008  | -2.98436942 | -0.01605821 |
| N    | 2.30729286  | -1.98368327 | -1.30825767 |
| H    | 3.18889382  | -1.52143483 | -1.26137094 |
| H    | 2.37095277  | -2.97198850 | -1.18951420 |
| N    | -1.75603513 | -1.58432619 | 1.20800752  |
| H    | -1.62069384 | -2.50309342 | 1.56035516  |
| H    | -2.58736855 | -1.09132940 | 1.44420844  |
| C    | 1.95887878  | 0.62598161  | 0.65736538  |
| C    | -2.39663638 | 0.93020034  | -0.18470735 |
| O    | 2.83032833  | -0.04239067 | 1.16864776  |
| O    | -3.29795747 | 0.56431921  | 0.54608833  |
| C    | 1.70263430  | 2.03403304  | 1.15632449  |
| H    | 2.38212073  | 2.71672312  | 0.65355009  |
| H    | 0.69204704  | 2.37382017  | 0.97503656  |
| H    | 1.91856224  | 2.06780074  | 2.21618116  |
| C    | -2.60724434 | 2.13489413  | -1.07803105 |
| H    | -1.91274824 | 2.92946991  | -0.82851623 |
| H    | -2.45308341 | 1.87727306  | -2.12069429 |
| H    | -3.61920895 | 2.49202097  | -0.94658669 |

**Table S7.** Cartesian coordinates of the Optimized Geometry of *m*-DAPA at S1S0-1PT calculated by CASSCF.

| Atom | x            | y            | z            |
|------|--------------|--------------|--------------|
| C    | 1.148994660  | -0.167569720 | -0.055626060 |
| C    | 1.185262010  | 1.282102240  | -0.233477260 |
| C    | -0.106881540 | 1.883604210  | -0.209980840 |
| C    | -1.283780890 | 1.166538500  | -0.110033410 |
| C    | -1.274145980 | -0.278374290 | 0.013289760  |
| C    | -0.016979920 | -0.894131330 | 0.036330940  |
| H    | -0.162640670 | 2.957920760  | -0.254075070 |
| H    | 0.039224710  | -1.961562990 | 0.143389560  |
| N    | -2.464604720 | 1.824565050  | -0.077071800 |
| H    | -3.311964540 | 1.305823850  | -0.068619760 |
| H    | -2.483123590 | 2.800690160  | -0.252134560 |
| N    | 2.370174570  | 1.796891390  | -0.412706330 |
| H    | 2.330305420  | 2.796892120  | -0.486359990 |
| H    | 2.447834520  | -0.652151780 | 1.851462260  |
| C    | 2.462967230  | -0.724601890 | 0.014624860  |
| O    | 3.007577400  | -0.947858910 | 1.135470330  |
| C    | -2.494098290 | -1.059924090 | 0.139750660  |
| O    | -3.605992920 | -0.578300290 | 0.110968350  |
| C    | 3.284239040  | -1.069329530 | -1.158736860 |
| H    | 4.167793710  | -1.627957670 | -0.893196490 |
| H    | 2.678850820  | -1.573252780 | -1.897891460 |
| H    | 3.556579120  | -0.095622070 | -1.562473390 |
| C    | -2.395669710 | -2.572032920 | 0.292867480  |
| H    | -3.398902190 | -2.962911860 | 0.367132210  |
| H    | -1.900398760 | -3.034655920 | -0.554160030 |
| H    | -1.848198950 | -2.841718600 | 1.189594580  |

**Table S8.** Cartesian coordinates of the Optimized Geometry of *m*-DAPA at S1S0-2PT calculated by CASSCF.

| Atom | x           | y           | z           |
|------|-------------|-------------|-------------|
| C    | 1.26337030  | 1.30951182  | -0.00117628 |
| C    | -0.00050787 | 1.97851752  | -0.00165645 |
| C    | 1.23740434  | -0.16519979 | 0.00041033  |
| C    | 0.00222344  | -0.85186396 | 0.00133572  |
| N    | 2.41170846  | 1.93585545  | -0.00207367 |
| C    | 2.43136074  | -0.87287629 | 0.00116419  |
| O    | 3.58401233  | -0.28453851 | 0.00104045  |
| C    | 2.52823072  | -2.37281404 | 0.00365185  |
| C    | -1.23794096 | -0.16287480 | 0.00062832  |
| C    | -1.26288831 | 1.31072010  | 0.00074931  |
| C    | -2.43233529 | -0.87290404 | -0.00226353 |
| C    | -2.52834522 | -2.37286662 | -0.00605745 |
| O    | -3.58320190 | -0.28205301 | -0.00058188 |
| N    | -2.41237539 | 1.93367930  | 0.00381356  |
| H    | 0.00017342  | 3.05495630  | -0.00175382 |
| H    | 0.00071243  | -1.92124784 | 0.00438592  |
| H    | 3.45540064  | 0.69785388  | -0.00007077 |
| H    | 2.31084965  | 2.93260006  | -0.00522735 |
| H    | 2.05333702  | -2.79009339 | 0.88463744  |
| H    | 2.04289918  | -2.79345966 | -0.86991779 |
| H    | 3.57025481  | -2.65799343 | -0.00191934 |
| H    | -2.06930488 | -2.79121121 | 0.88306182  |
| H    | -3.57022202 | -2.65756767 | -0.02980681 |
| H    | -2.02751664 | -2.79300853 | -0.87094751 |
| H    | -2.31298745 | 2.93074939  | 0.00443955  |
| H    | -3.45420743 | 0.70022846  | 0.00193541  |

10. Cartesian coordinates of all optimized structures calculated by OM2/MRCI.

**Table S9.** Cartesian coordinates of the Optimized Geometry of *m*-DAPA at S0-KETO calculated by OM2/MRCI.

| Atom | x            | y            | z            |
|------|--------------|--------------|--------------|
| C    | -1.217206826 | 0.143374617  | 0.134377010  |
| C    | -0.001461710 | 0.814159065  | 0.034097846  |
| C    | 1.220163459  | 0.142922073  | -0.089194523 |
| C    | 1.211998754  | -1.292805634 | -0.145621686 |
| C    | -0.003827751 | -1.991014748 | -0.032837904 |
| C    | -1.220564586 | -1.293364447 | 0.125534135  |
| H    | 0.001722517  | 1.912744613  | 0.058047611  |
| H    | -0.007193018 | -3.075724331 | -0.046454609 |
| N    | 2.368892766  | -1.989242761 | -0.285966630 |
| H    | 3.252955190  | -1.521106781 | -0.343096351 |
| H    | 2.371878552  | -2.984911258 | -0.263652248 |
| N    | -2.377464950 | -1.990911667 | 0.246787121  |
| H    | -2.383707703 | -2.983733789 | 0.175668081  |
| H    | -3.258872691 | -1.525432961 | 0.342508998  |
| C    | 2.494619336  | 0.865296437  | -0.113676971 |
| C    | -2.493945027 | 0.866260503  | 0.178033376  |
| O    | 3.572360699  | 0.266782916  | -0.272381729 |
| O    | -3.563584790 | 0.278058740  | 0.359307066  |
| C    | 2.526200963  | 2.353466591  | 0.107661284  |
| H    | 1.943820432  | 2.861881136  | -0.670677092 |
| H    | 2.113534377  | 2.591843913  | 1.095656576  |
| H    | 3.566042207  | 2.689964104  | 0.059667044  |
| C    | -2.526335112 | 2.348353723  | -0.105324060 |
| H    | -1.926237916 | 2.884292464  | 0.638349867  |
| H    | -2.136593476 | 2.541042600  | -1.110159875 |
| H    | -3.563501944 | 2.689114504  | -0.044905412 |



**Table S10.** Cartesian coordinates of the Optimized Geometry of *m*-DAPA at S0-1PT calculated by OM2/MRCI.

| Atom | x            | y            | z            |
|------|--------------|--------------|--------------|
| C    | -1.230030000 | 0.113860000  | 0.170100000  |
| C    | 0.045800000  | 0.778070000  | 0.209090000  |
| C    | 1.207690000  | 0.080920000  | 0.022740000  |
| C    | 1.179580000  | -1.359280000 | -0.214790000 |
| C    | -0.014660000 | -2.041970000 | -0.143430000 |
| C    | -1.249560000 | -1.365380000 | 0.199730000  |
| H    | 0.061970000  | 1.866320000  | 0.345330000  |
| H    | -0.066540000 | -3.115710000 | -0.285270000 |
| N    | 2.357450000  | -2.026690000 | -0.453840000 |
| H    | 2.296560000  | -2.916770000 | -0.909640000 |
| H    | 3.179800000  | -1.503900000 | -0.687380000 |
| N    | -2.266230000 | -2.088570000 | 0.582240000  |
| H    | -3.080870000 | -1.560180000 | 0.935490000  |
| H    | -3.549290000 | -0.539920000 | -0.600650000 |
| C    | 2.505480000  | 0.807290000  | -0.042630000 |
| C    | -2.379790000 | 0.875420000  | 0.020860000  |
| O    | 3.395430000  | 0.446940000  | -0.810920000 |
| O    | -3.609850000 | 0.350320000  | -0.163080000 |
| C    | 2.689080000  | 2.047240000  | 0.791220000  |
| H    | 3.758240000  | 2.244520000  | 0.893370000  |
| H    | 2.217010000  | 2.893250000  | 0.273670000  |
| H    | 2.240610000  | 1.920330000  | 1.779560000  |
| C    | -2.504890000 | 2.359410000  | 0.170480000  |
| H    | -2.153350000 | 2.834410000  | -0.753310000 |
| H    | -3.556690000 | 2.614830000  | 0.331610000  |
| H    | -1.908200000 | 2.711720000  | 1.023330000  |

**Table S11.** Cartesian coordinates of the Optimized Geometry of *m*-DAPA at S1-KETO calculated by OM2/MRCI.

| Atom | x            | y            | z            |
|------|--------------|--------------|--------------|
| C    | 1.238360000  | 0.160440000  | 0.001000000  |
| C    | 0.000370000  | 0.835830000  | 0.001560000  |
| C    | -1.237560000 | 0.128710000  | 0.001810000  |
| C    | -1.238210000 | -1.304210000 | 0.001570000  |
| C    | -0.004310000 | -2.013850000 | 0.000790000  |
| C    | 1.219130000  | -1.296210000 | 0.000440000  |
| H    | -0.009370000 | 1.926000000  | 0.001840000  |
| H    | -0.002320000 | -3.106290000 | 0.000470000  |
| N    | -2.398170000 | -2.006430000 | 0.002010000  |
| H    | -3.287250000 | -1.540880000 | 0.002540000  |
| H    | -2.394170000 | -3.003560000 | 0.001770000  |
| N    | 2.389160000  | -1.959920000 | -0.000410000 |
| H    | 2.421850000  | -2.962970000 | -0.000890000 |
| H    | 3.267540000  | -1.428950000 | -0.000570000 |
| C    | -2.506140000 | 0.850120000  | 0.002300000  |
| C    | 2.513670000  | 0.849720000  | 0.000980000  |
| O    | -3.590320000 | 0.247890000  | 0.002840000  |
| O    | 3.589750000  | 0.204530000  | 0.000180000  |
| C    | -2.525000000 | 2.360650000  | 0.002070000  |
| H    | -2.022250000 | 2.737750000  | 0.899040000  |
| H    | -2.022420000 | 2.737500000  | -0.895110000 |
| H    | -3.567330000 | 2.693620000  | 0.002130000  |
| C    | 2.561530000  | 2.354630000  | 0.001990000  |
| H    | 2.064760000  | 2.748700000  | -0.895650000 |
| H    | 2.064770000  | 2.747510000  | 0.900160000  |
| H    | 3.611730000  | 2.664410000  | 0.002180000  |

**Table S12.** Cartesian coordinates of the Optimized Geometry of *m*-DAPA at S1-1PT calculated by OM2/MRCI.

| Atom | x            | y            | z            |
|------|--------------|--------------|--------------|
| C    | 1.185795409  | 0.190101298  | 0.233601776  |
| C    | -0.042058654 | 0.824125352  | 0.278386672  |
| C    | -1.246979038 | 0.129535481  | 0.049205363  |
| C    | -1.198277659 | -1.265794100 | -0.220931603 |
| C    | 0.051360672  | -1.941719697 | -0.237650827 |
| C    | 1.240485016  | -1.223894840 | -0.037846578 |
| H    | -0.080531442 | 1.888211795  | 0.526694605  |
| H    | 0.094203640  | -3.000666193 | -0.502438972 |
| N    | -2.331272591 | -1.989980500 | -0.466322449 |
| H    | -3.238303408 | -1.567343159 | -0.402018903 |
| H    | -2.285241331 | -2.968461050 | -0.652068227 |
| N    | 2.469125192  | -1.833186979 | -0.071810432 |
| H    | 2.440624802  | -2.787097134 | 0.327509456  |
| H    | 3.445316524  | -0.794493864 | 0.624148410  |
| C    | -2.550300518 | 0.824387880  | 0.071204911  |
| C    | 2.463729994  | 0.898107899  | 0.520246171  |
| O    | -3.601819671 | 0.195089071  | -0.068395166 |
| O    | 3.469758290  | 0.183040966  | 0.991673848  |
| C    | -2.596320372 | 2.323404381  | 0.233090400  |
| H    | -2.208531068 | 2.596985163  | 1.219838806  |
| H    | -1.997726091 | 2.805538521  | -0.547014627 |
| H    | -3.637343515 | 2.649305107  | 0.149678059  |
| C    | 2.862911201  | 1.992527331  | -0.434132505 |
| H    | 3.089023080  | 1.556083321  | -1.415513339 |
| H    | 2.046188476  | 2.716947860  | -0.542187234 |
| H    | 3.751927849  | 2.488298130  | -0.037914826 |

**Table S13.** Cartesian coordinates of the Optimized Geometry of *m*-DAPA at S1S0-1PT calculated by OM2/MRCI.

| Atom | x            | y            | z            |
|------|--------------|--------------|--------------|
| C    | 1.154822871  | -0.210671838 | -0.023967192 |
| C    | 1.170120973  | 1.241343167  | -0.207940959 |
| C    | -0.111334649 | 1.872189100  | -0.221630921 |
| C    | -1.291320495 | 1.141682900  | -0.102892454 |
| C    | -1.258720637 | -0.299002806 | 0.039024460  |
| C    | -0.030164111 | -0.937818750 | 0.065484487  |
| H    | -0.139587568 | 2.955524988  | -0.336824355 |
| H    | 0.026825659  | -2.032939505 | 0.166527287  |
| N    | -2.489062053 | 1.792679493  | -0.115543376 |
| H    | -3.355472758 | 1.296325642  | -0.054760839 |
| H    | -2.528324676 | 2.779827823  | -0.241243690 |
| N    | 2.353174229  | 1.793416588  | -0.332966684 |
| H    | 2.312263065  | 2.815564182  | -0.454873535 |
| H    | 2.612395242  | -0.509364822 | 1.891818878  |
| C    | 2.470434382  | -0.788594346 | -0.009932104 |
| O    | 3.139174665  | -0.873510419 | 1.126990831  |
| C    | -2.508282726 | -1.062631126 | 0.142680967  |
| O    | -3.615131965 | -0.514728190 | 0.116080047  |
| C    | 3.322409243  | -1.056466575 | -1.192267338 |
| H    | 4.184920419  | -1.676105640 | -0.931566280 |
| H    | 2.727525645  | -1.525765797 | -1.982059476 |
| H    | 3.657025242  | -0.063918874 | -1.523110384 |
| C    | -2.468630662 | -2.568211292 | 0.286557024  |
| H    | -3.496533226 | -2.937241856 | 0.346723268  |
| H    | -1.974362654 | -3.015006294 | -0.584151386 |
| H    | -1.931743277 | -2.843504477 | 1.202182196  |

11. Cartesian coordinates of all optimized structures calculated by B3LYP/6-31G\* and CAM-B3LYP methods.

**Table S14.** Cartesian coordinates of the Optimized Geometry of *m*-DAPA at S0-KETO calculated by B3LYP.

| Atom | x            | y            | z            |
|------|--------------|--------------|--------------|
| C    | 1.232076000  | -0.099714000 | -0.002112000 |
| C    | -0.000209000 | -0.746389000 | -0.000324000 |
| C    | -1.232572000 | -0.099845000 | 0.004320000  |
| C    | -1.224174000 | 1.339243000  | 0.007889000  |
| C    | -0.000347000 | 2.011262000  | 0.006124000  |
| C    | 1.223499000  | 1.339377000  | 0.001518000  |
| H    | -0.000176000 | -1.828509000 | -0.003416000 |
| H    | -0.000409000 | 3.098295000  | 0.009647000  |
| N    | -2.380736000 | 2.032153000  | 0.014553000  |
| H    | -3.249327000 | 1.511675000  | 0.008168000  |
| H    | -2.374653000 | 3.039369000  | 0.007017000  |
| N    | 2.380044000  | 2.032408000  | 0.002009000  |
| H    | 2.373857000  | 3.039626000  | -0.005066000 |
| H    | 3.248652000  | 1.512040000  | -0.008425000 |
| C    | -2.479826000 | -0.866876000 | 0.003688000  |
| C    | 2.479405000  | -0.866619000 | -0.009230000 |
| O    | -3.589917000 | -0.328437000 | 0.004650000  |
| O    | 3.589423000  | -0.328076000 | -0.013530000 |
| C    | -2.422249000 | -2.382288000 | 0.001309000  |
| H    | -1.903357000 | -2.761301000 | -0.884145000 |
| H    | -1.899421000 | -2.764071000 | 0.883230000  |
| H    | -3.444983000 | -2.759072000 | 0.002871000  |
| C    | 2.421945000  | -2.382040000 | -0.011887000 |
| H    | 1.903753000  | -2.764268000 | 0.872568000  |
| H    | 1.898488000  | -2.760696000 | -0.894805000 |
| H    | 3.444709000  | -2.758729000 | -0.015781000 |

**Table S15.** Cartesian coordinates of the Optimized Geometry of *m*-DAPA at S1-KETO calculated by TD-CAM-B3LYP.

| Atom | x            | y            | z            |
|------|--------------|--------------|--------------|
| C    | 1.234999000  | 0.106883000  | -0.169050000 |
| C    | 0.000057000  | 0.760413000  | -0.425277000 |
| C    | -1.234999000 | 0.106761000  | -0.168929000 |
| C    | -1.218402000 | -1.339013000 | -0.047006000 |
| C    | -0.000176000 | -2.022831000 | 0.002583000  |
| C    | 1.218000000  | -1.339165000 | -0.047706000 |
| H    | -0.000020000 | 1.816093000  | -0.649933000 |
| H    | -0.000187000 | -3.106022000 | 0.075605000  |
| N    | -2.382786000 | -2.001939000 | 0.022021000  |
| H    | -3.237744000 | -1.446042000 | 0.000034000  |
| H    | -2.399757000 | -2.992307000 | 0.215553000  |
| N    | 2.382451000  | -2.001952000 | 0.019774000  |
| H    | 2.399777000  | -2.992377000 | 0.213116000  |
| H    | 3.237262000  | -1.445576000 | -0.001924000 |
| C    | -2.477260000 | 0.863314000  | -0.007837000 |
| C    | 2.477294000  | 0.863076000  | -0.007549000 |
| O    | -3.604579000 | 0.319457000  | -0.023591000 |
| O    | 3.604746000  | 0.319020000  | -0.023722000 |
| C    | -2.386591000 | 2.362746000  | 0.110691000  |
| H    | -1.626919000 | 2.662124000  | 0.841810000  |
| H    | -2.109304000 | 2.822796000  | -0.846719000 |
| H    | -3.361339000 | 2.751009000  | 0.409391000  |
| C    | 2.386866000  | 2.362445000  | 0.111441000  |
| H    | 2.110514000  | 2.823019000  | -0.846009000 |
| H    | 1.626652000  | 2.661754000  | 0.842042000  |
| H    | 3.361444000  | 2.750415000  | 0.411100000  |

12. Cartesian coordinates of optimized CI structure of *o*-DAPA calculated by CASSCF method.

**Table S16.** Cartesian coordinates of the Optimized Geometry of *o*-DAPA at CI point calculated by CASSCF.

| Atom | x           | y           | z           |
|------|-------------|-------------|-------------|
| C    | -1.06040305 | -1.07276230 | 0.94425135  |
| C    | 0.11419755  | -0.76495990 | 1.63859432  |
| C    | 1.05684826  | 0.05811776  | 1.05634128  |
| C    | 0.86556104  | 0.53254788  | -0.27257468 |
| C    | -0.34152810 | 0.25597113  | -0.95169821 |
| C    | -1.30794937 | -0.56300586 | -0.33511856 |
| H    | -1.78407196 | -1.70353843 | 1.41998709  |
| H    | 0.28574991  | -1.18236038 | 2.61359586  |
| C    | -2.59798775 | -0.89224968 | -1.01736235 |
| O    | -2.89088927 | -0.43623583 | -2.08874329 |
| C    | 2.39364866  | 0.39601970  | 1.62668481  |
| O    | 3.34797185  | 0.19615060  | 0.78057600  |
| C    | -3.57483638 | -1.83151989 | -0.33658047 |
| H    | -4.41835504 | -1.96828362 | -0.99714042 |
| H    | -3.11882690 | -2.79383883 | -0.13206079 |
| H    | -3.92305677 | -1.41904663 | 0.60416373  |
| C    | 2.55019207  | 1.42969937  | 2.70101696  |
| H    | 1.90138026  | 1.22025870  | 3.54469403  |
| H    | 3.57910682  | 1.45831122  | 3.03735187  |
| H    | 2.28742813  | 2.41698406  | 2.32031807  |
| N    | -0.48984206 | 0.80720490  | -2.20931402 |
| H    | -0.13497402 | 1.73331552  | -2.30292773 |
| H    | -1.39463573 | 0.69141041  | -2.60912579 |
| N    | 1.90317276  | 1.22354698  | -0.85361639 |
| H    | 1.90124377  | 1.09876627  | -1.85111911 |
| H    | 2.97828369  | 0.69885776  | -0.14794737 |
